# Supplementary material
Source: ML conference proceedings conference paper supplement (https://openreview.net/forum?id=bn4qZxltsH)
Supplement: supplementary_material [file attachment]

# 1 Appendix

## 2 A.1 List of Datasets

|                       | semantic | instance | panoptic | grounding | part | training | # images |
|-----------------------|----------|----------|----------|-----------|------|----------|----------|
| ADE-150               | ✓        | ✓        | ✓        |           |      |          | 2000     |
| Pascal VOC            | ✓        |          |          |           |      |          | 1449     |
| Pascal Context-59     | ✓        |          |          |           |      |          | 5105     |
| Pascal-Panoptic-Parts | ✓        | ✓        | ✓        |           | ✓    | *        | 10103    |
| COCO                  | ✓        | ✓        | ✓        |           |      | ✓        | 121408   |
| RefCOCO               |          |          |          | ✓         |      | ✓        | 19994    |
| RefCOCO+              |          |          |          | ✓         |      | ✓        | 19992    |
| RefCOCOG              |          |          |          | ✓         |      | ✓        | 26711    |

**Table A1: List of the dataset used.** The checkmarks denote whether a dataset has a particular type of annotation and whether the dataset is used in the training process. \* Because of a data leak between Pascal-Panoptic-Parts and other Pascal datasets, we use weights trained without Pascal-Panoptic-Parts in those evaluations unless otherwise specified.

3 We report the statistics of datasets used in training and evaluation in table Table A1. Additionally, we  
4 further evaluate our model on 35 object detection datasets and 25 segmentation datasets in Sec. A.3.2.  
5 In total, we benchmarked our model on around 70 datasets. These benchmarks show our model can  
6 adapt to many different scenarios and retain a reasonable performance in a zero-shot manner.

## 7 A.2 Experiment Setup

### 8 A.2.1 Implementation Details

9 For loss functions in Eq. (3), we have  $\lambda_{cls} = 2.0$ ,  $\lambda_{mask} = 5.0$ ,  $\lambda_{box} = 5.0$ ,  $\lambda_{ce} = 1.0$ ,  $\lambda_{dice} =$   
10  $1.0$ ,  $\lambda_{L1} = 1.0$ ,  $\lambda_{giou} = 0.2$ . For  $\lambda$  in Eq. (4), we use  $\lambda = 0.2$  for seen classes during the training  
11 and  $\lambda = 0.45$  for novel classes. In close-set evaluation, we set  $\lambda = 0.0$  and do not use CLIP. We also  
12 do not use CLIP for PAS-21 evaluation (whose classes are mostly covered by COCO) because we  
13 find it degrades the performance. We use 800 and 1024-resolution images during the training. For  
14 evaluations, we use 1024-resolution images.

### 15 A.2.2 Training Process

| Stage | Task    | Dataset               | Batch Size | Max Iter | Step          |
|-------|---------|-----------------------|------------|----------|---------------|
| I     | OD&IS   | Objects365            | 64         | 340741   | 312346        |
| II    | OD&IS   | COCO                  | 32         | 91990    | 76658         |
|       | REC&RIS | RefCOCO/g/+           | 32         |          |               |
| III   | PanoS   | COCO                  | 32         | 150000   | 100000,135000 |
|       | REC&RIS | RefCOCO/g/+           | 32         |          |               |
|       | PartS   | Pascal-Panoptic-Parts | 32         |          |               |

**Table A2: Training Process.** Following UNINEXT [61], We first pretrain our model for object detection on Object365 for 340k iteration (Stage I). Then we fine-tune our model jointly on COCO for object detection, instance segmentation, referring expression comprehension (REC), and referring segmentation (RIS) for 92k iteration (Stage II). We further jointly train our model on Panoptic Segmentation, REC, RIS, and Part Segmentation for 150k iteration (Stage III)

16 We train all our models on NVIDIA-A100 GPUs with a batch size of 2 per GPU using AdamW [41]  
17 optimizer. We use a base learning rate of 0.0001 and a weight decay of 0.01. The learning rate of  
18 the backbone is further multiplied by 0.1. Following UNINEXT [61], We first pretrain our model  
19 for object detection on Object365 for 340k iteration (Stage I). Then we fine-tune our model jointly  
20 on COCO for object detection, instance segmentation, referring expression comprehension (REC),

21 and referring segmentation (RIS) for 91k iteration (Stage II). We further jointly train our model on  
 22 Panoptic Segmentation, REC, RIS, and Part Segmentation for 150k iteration (Stage III). In Stage I,  
 23 the learning rate is dropped by a factor of 10 after 312k iterations. In stage II, the learning rate is  
 24 dropped by a factor of 10 after 77k iterations. In Stage III, the learning rate is dropped by a factor of  
 25 10 after 100k and 135k iterations. In all stages, we sample uniformly across datasets when there are  
 26 multiple datasets. The global batch size is 64 in Stage I and 32 in Stage II and III. Notably, our stage  
 27 I and II is identical to the setup of UNINEXT. For ablation studies, we train stage III only and reduce  
 28 the schedule to 90k iterations. The learning rate schedule is also scaled accordingly. The details of  
 29 training recipe is shown in Table A2.

### 30 A.3 Additional Evaluations

#### 31 A.3.1 Referring Expression Comprehension

| Method                | Backbone | RefCOCO     |             | RefCOCO+    |             | RefCOCog    |             |
|-----------------------|----------|-------------|-------------|-------------|-------------|-------------|-------------|
|                       |          | oIoU        | P@0.5       | oIoU        | P@0.5       | oIoU        | P@0.5       |
| MAttNet [63]          | RN101    | 56.5        | 76.7        | 46.7        | 65.3        | 47.6        | 66.6        |
| VLT [9]               | Dark56   | 65.7        | 76.2        | 55.5        | 64.2        | 53.0        | 61.0        |
| RefTR [43]            | RN101    | 74.3        | 85.7        | 66.8        | 77.6        | 64.7        | 82.7        |
| UNINEXT [61]          | RN50     | 77.9        | 89.7        | 66.2        | 79.7        | 70.0        | 84.0        |
| UNINEXT [61]          | ViT-H    | 82.2        | 92.6        | 72.5        | 85.2        | 74.7        | 88.7        |
| HIPIE                 | RN50     | 78.3        | 90.1        | 66.2        | 80.0        | 69.8        | 83.6        |
| HIPIE                 | ViT-H    | 82.6        | 93.0        | 73.0        | 85.5        | 75.3        | 88.9        |
| <i>vs. prev. SOTA</i> |          | <b>+0.4</b> | <b>+0.4</b> | <b>+0.5</b> | <b>+0.3</b> | <b>+0.6</b> | <b>+0.2</b> |

**Table A3:** Comparison on the referring expression comprehension (REC), and referring image segmentation (RIS) tasks. The evaluation is carried out on the validation sets of RefCOCO, RefCOCO+, and RefCOCog datasets using Precision@0.5 and overall IoU (oIoU) metrics for REC and RIS, respectively.

32 In addition to Referring Segmentation reported in Table 6, we further report results on Referring  
 33 Expression Comprehension (REC). We establish new state-of-the-art performance by an average of  
 34 +0.3 P@0.5 and +0.5 oIoU across three datasets.

#### 35 A.3.2 Object Detection and Segmentation in the Wild

36 To further examine the open-vocabulary capability of our model, we evaluate it on the Segmentation  
 37 in the Wild (SeginW) [69] consisting of 25 diverse segmentation datasets and Object Detection  
 38 in the Wild (OdinW) [32] Benchmark consisting of 35 diverse detection datasets. Since OdinW  
 39 benchmark contains Pascal VOC and some of the classes in SeginW benchmark are covered by  
 40 Pascal-Panoptic-Parts, we use a version of our model that is not trained on Pascal-Panoptic-Parts for  
 41 both benchmarks for a fair comparison.

42 We report the results in Table A6 and Table A7. Notably, our method establishes a new state-of-the-art  
 43 of SeginW benchmark by an average of +8.9 mAP across 25 datasets. We achieve comparable  
 44 performance under similar settings. In particular, our ResNet-50 baseline outperforms GLIP-T  
 45 by +3.1 mAP. We note that other methods such as GroundingDINO [39] achieve better absolute  
 46 performance by introducing more grounding data, which can be critical in datasets whose classes are  
 47 not common objects. (For example, the classes of Boggle Boards are letters, the classes of UnoCards  
 48 are numbers, and the classes of websiteScreenshots are UI elements).

### 49 A.4 Other Ablation Studies

50 We provide further ablations on a few design choices in this section.

51 **Text Encoder.** We experiment with replacing the BERT text encoder in UNINEXT with a pre-trained  
 52 CLIP encoder. Additionally, following practices of ODISE [59], we prompt each label to a sentence  
 53 "a photo of <label>". For RIS and REC tasks, the language expression remains unchanged. We report  
 54 the result in Table A4. We find that while CLIP and BERT achieve similar performance on panoptic



|      | COCO        |                    | RefCOCO     |
|------|-------------|--------------------|-------------|
|      | PQ          | AP <sup>Mask</sup> | oIoU        |
| CLIP | <b>51.5</b> | 44.3               | 48.7        |
| BERT | 51.3        | <b>44.4</b>        | <b>77.3</b> |

**Table A4:** Ablation Studies on the choice of Text Encoder. We find that while CLIP and BERT achieve similar performance on panoptic and instance segmentation, BERT performs significantly better on Referring Instance Segmentation (+28.6 oIoU).

|         | COCO        |                    | RefCOCO     |
|---------|-------------|--------------------|-------------|
|         | PQ          | AP <sup>Mask</sup> | oIoU        |
| w/o OTA | 50.9        | 43.6               | 76.3        |
| w/ OTA  | <b>51.3</b> | <b>44.4</b>        | <b>77.3</b> |

**Table A5:** Ablation Studies on the SimOTA matching process. Introducing SimOTA leads to performance improvement in all evaluation metrics.

55 and instance segmentation, BERT performs significantly better on referring instance segmentation  
 56 (+28.6 oIoU). We hypothesize that this may be caused by the lack of explicit language-focused  
 57 training which can help achieve a better understanding of referring expression.

58 **SimOTA.** Following UNINEXT [61] we adopted simOTA in the matching process for "thing" classes  
 59 during the training. We experiment with removing simOTA matching and use standard one-to-one  
 60 matching instead. We report the result in Table A5. We find that simOTA improves the performance  
 61 on both panoptic segmentation and referring instance segmentation.

## 62 A.5 Limitations

63 We’ve showcased experimental evidence supporting our method across a diverse set of tasks, including  
 64 open vocabulary panoptic and semantic segmentation, instance and referring segmentation, and object  
 65 detection. However, it will be crucial for future work to test our methodology on video-related tasks,  
 66 such as object tracking and segmentation, to draw comparisons with other universal models like  
 67 UNINEXT [61]. Furthermore, it’s worth considering additional pretraining of our vision encoder on  
 68 newer, more complex datasets that encompass a vast amount of masks and information. For instance,  
 69 SA-1B [27], which includes over 1 billion masks, would serve as an ideal training ground. Lastly,  
 70 it would be advantageous to measure the change in performance when training on supplementary  
 71 hierarchical datasets. Such an approach will allow us to demonstrate more varied object part  
 72 segmentations, thereby expanding the capabilities and versatility of our model.

## 73 A.6 Broader Impact

74 Our research introduces a potent approach to hierarchical and universal open vocabulary image  
 75 segmentation, aiming to address the ever-increasing demand for more data and advanced model  
 76 architectures. As the demand increases, practical methodologies such as universal segmentation are  
 77 projected to play a vital role in constructing and training foundational models. Our model, HIPIE,  
 78 shows promise for fostering progress in a multitude of fields where hierarchical data are critical,  
 79 including self-driving cars, manufacturing, and medicine. However, it’s imperative to acknowledge  
 80 potential limitations. Given that our model is trained on human annotations and feedback, it can  
 81 inadvertently replicate any errors or biases present in the datasets. The architecture’s complexity is  
 82 further enhanced when multiple models are integrated, which, in turn, compromises the explainability  
 83 of the final predictions. Therefore, as with the introduction of any novel technology, it’s crucial to  
 84 implement safety protocols to mitigate misuse. This includes mechanisms for ensuring the accuracy  
 85 of inputs and establishing procedures to comprehend the criteria the model employs for predictions.  
 86 By doing so, we can improve the model’s reliability and mitigate potential issues.

## 87 **A.7 Qualitative Results**

### 88 **A.7.1 More Visualizations**

89 We provide more visualizations of panoptic segmentation, part segmentation and referring segmenta-  
90 tion in Figs. A1 to A3.

### 91 **A.7.2 Combining with SAM**

92 We integrate our model with the mask outputs generated by the ViT-H Image encoder from Segment  
93 Anything (SAM) [27]. The encoder is trained on SA-1B which encompasses a broad spectrum of  
94 objects and masks within each image, enabling us to enhance our segmentation output by utilizing  
95 the high-quality masks from the SAM encoder to generate finer, more detailed masks.

96 To elaborate, in the context of panoptic segmentation, we implement a voting scheme between our  
97 pixel-wise annotations and the masks from Segment Anything (SAM), enriching these masks with  
98 our labels. For objects where our model demonstrates a strong understanding of hierarchy, such as  
99 "person" or "bird", we substitute the SAM masks with ours. This approach enables us to optimize  
100 hierarchical outcomes in the face of highly complex images.

101 Based on our observations from the figures, it's evident that Grounding DINO generates instance  
102 segmentation bounding boxes and subsequently uses SAM for the application of the segmentation  
103 masks. While this method proves effective for most datasets, SA-1B is a highly complex set featuring  
104 a vast array of whole objects, parts and subparts. Our qualitative findings suggest that the a single  
105 granularity instance segmentation model may fail to fully capture all objects/parts within an image  
106 or may incorrectly identify them. This consequently leads to SAM receiving sub-optimal bounding  
107 boxes for segmentation, resulting in fewer and less accurate masks (see third columns in Figs. A4  
108 to A8). In contrast, our methodology (see last columns in Figs. A4 to A8) integrates the SAM encoder  
109 masks with our annotations and hierarchical masks wherever feasible. This results in a significantly  
110 more fine-grained and accurate output, proving superior in handling complex datasets such as SA-1B.

### 111 **A.7.3 Combining with Stable Diffusion**

112 As an interesting experiment, we combined our model with image generation model Stable-  
113 Diffusion[49] in Fig. A9. Given a source expression and target prompt, we first use HIPIE's  
114 segmentation capability to find the corresponding masks, which are then used for image inpainting.  
115 Notably, our model can uniquely achieve fine-grained control over object parts by providing part  
116 segmentation masks.

|                    | HIPIE (H)   | X-Decoder(L)[69] |
|--------------------|-------------|------------------|
| Mean               | <b>41.2</b> | 32.3             |
| Median             | <b>45.1</b> | 22.3             |
| Airplane-Parts     | <b>14.0</b> | 13.1             |
| Bottles            | <b>45.1</b> | 42.1             |
| Brain-Tumor        | 1.9         | <b>2.2</b>       |
| Chicken            | <b>46.5</b> | 8.6              |
| Cows               | <b>50.1</b> | 44.9             |
| Electric-Shaver    | <b>76.1</b> | 7.5              |
| Elephants          | <b>68.6</b> | 66.0             |
| Fruits             | 61.1        | <b>79.2</b>      |
| Garbage            | 31.2        | <b>33.0</b>      |
| Ginger-Garlic      | <b>24.3</b> | 11.6             |
| Hand               | <b>94.2</b> | 75.9             |
| Hand-Metal         | <b>64.0</b> | 42.1             |
| House-Parts        | 6.8         | <b>7.0</b>       |
| HouseHold-Items    | <b>53.4</b> | 53.0             |
| Nutterfly-Squireel | <b>79.7</b> | 68.4             |
| Phones             | 7.0         | 15.6             |
| Poles              | 6.7         | 20.1             |
| Puppies            | <b>64.6</b> | 59.0             |
| Rail               | 2.2         | <b>2.3</b>       |
| Salmon-Fillet      | <b>41.8</b> | 19.0             |
| Strawberry         | <b>81.5</b> | 67.1             |
| Tablets            | 8.8         | <b>22.5</b>      |
| Toolkits           | <b>17.9</b> | 9.9              |
| Trash              | <b>31.2</b> | 22.3             |
| Watermelon         | <b>50.6</b> | 13.8             |

**Table A6:** Segmentation Result on SeginW benchmark across 25 datasets. We report mAP. We outperform X-Decoder by a large margin (+8.9)

|                                   | HIPIE             |             | GLIP-T [32] | MDETR[24]     |
|-----------------------------------|-------------------|-------------|-------------|---------------|
|                                   | ViT-H             | R50         | Swin-T      | EffNet-B5     |
| Pretraining Data                  | O365,COCO,RefCOCO |             | O365        | GOLDG,RefCOCO |
| Mean                              | <b>17.9</b>       | 14.5        | 11.4        | 10.7          |
| Median                            | <b>5.5</b>        | 3.9         | 1.6         | 3.0           |
| AerialMaritimeDrone_large         | <b>10.9</b>       | 5.2         | 8.3         | 0.6           |
| AerialMaritimeDrone_tiled         | 16.6              | 9.6         | <b>17.1</b> | 5.4           |
| AmericanSignLanguageLetters       | 2.8               | <b>2.9</b>  | 0.1         | 0.3           |
| Aquarium                          | <b>18.3</b>       | 8.6         | 16.0        | 1.7           |
| BCCD                              | <b>8.0</b>        | 6.0         | 1.7         | 6.7           |
| boggleBoards                      | <b>0.1</b>        | 0.0         | 0.0         | 0.0           |
| brackishUnderwater                | <b>2.7</b>        | 0.9         | 1.7         | 0.7           |
| ChessPieces                       | <b>5.5</b>        | 3.8         | 0.0         | 3.0           |
| CottontailRabbits                 | <b>75.7</b>       | 69.5        | 57.0        | 66.5          |
| dice_mediumColor                  | 0.3               | <b>0.5</b>  | 0.5         | 0.0           |
| DroneControl                      | <b>1.6</b>        | 0.7         | 0.1         | 3.8           |
| EgoHands_generic                  | <b>6.6</b>        | 5.8         | 1.1         | 5.9           |
| EgoHands_specific                 | 0.5               | 0.2         | 0.1         | <b>3.5</b>    |
| HardHatWorkers                    | 1.8               | 1.4         | <b>2.7</b>  | 0.4           |
| MaskWearing                       | <b>1.1</b>        | 0.8         | 0.6         | 0.4           |
| MountainDewCommercial             | 8.5               | <b>37.7</b> | 15.3        | 3.0           |
| NorthAmericaMushrooms             | <b>42.7</b>       | 27.4        | 5.9         | 39.8          |
| openPoetryVision                  | 0.0               | 0.0         | 0.0         | 0.0           |
| OxfordPets_by-breed               | 7.2               | <b>7.8</b>  | 0.3         | 0.0           |
| OxfordPets_by-species             | <b>2.7</b>        | 2.5         | 1.6         | 0.7           |
| Packages                          | 56.2              | <b>68.1</b> | 58.3        | 63.6          |
| Pascal VOC                        | <b>66.0</b>       | 58.6        | 51.2        | 5.6           |
| Pistols                           | <b>66.8</b>       | 36.4        | 31.6        | 15.9          |
| PKLot                             | <b>2.6</b>        | 1.1         | 0.0         | 0.0           |
| plantdoc                          | 3.6               | <b>3.7</b>  | 1.6         | 0.5           |
| Pothole                           | 2.9               | 3.9         | 1.6         | <b>12.7</b>   |
| Raccoon                           | 49.7              | 33.4        | 6.2         | <b>50.6</b>   |
| selfdrivingCar_fixedLarge_export_ | 7.3               | 5.3         | <b>7.4</b>  | 2.8           |
| ShellfishOpenImages               | <b>49.6</b>       | 27.5        | 15.9        | 8.1           |
| ThermalCheetah                    | 0.3               | 0.5         | 0.2         | <b>4.5</b>    |
| thermalDogsAndPeople              | <b>53.3</b>       | 24.5        | 38.7        | 42.8          |
| UnoCards                          | 0.0               | 0.0         | 0.0         | 0.0           |
| Vehicles-OpenImages               | 53.5              | 53.9        | <b>55.0</b> | 13.4          |
| websiteScreenshots                | 0.4               | 0.3         | 0.3         | <b>0.7</b>    |
| WildfireSmoke                     | 0.3               | 0.0         | 0.0         | 12.5          |

**Table A7:** Object Detection Result in OdinW benchmark. We report mAP. We achieve comparable performance under similar settings. In particular, our ResNet-50 baseline outperforms GLIP-T by +3.1.

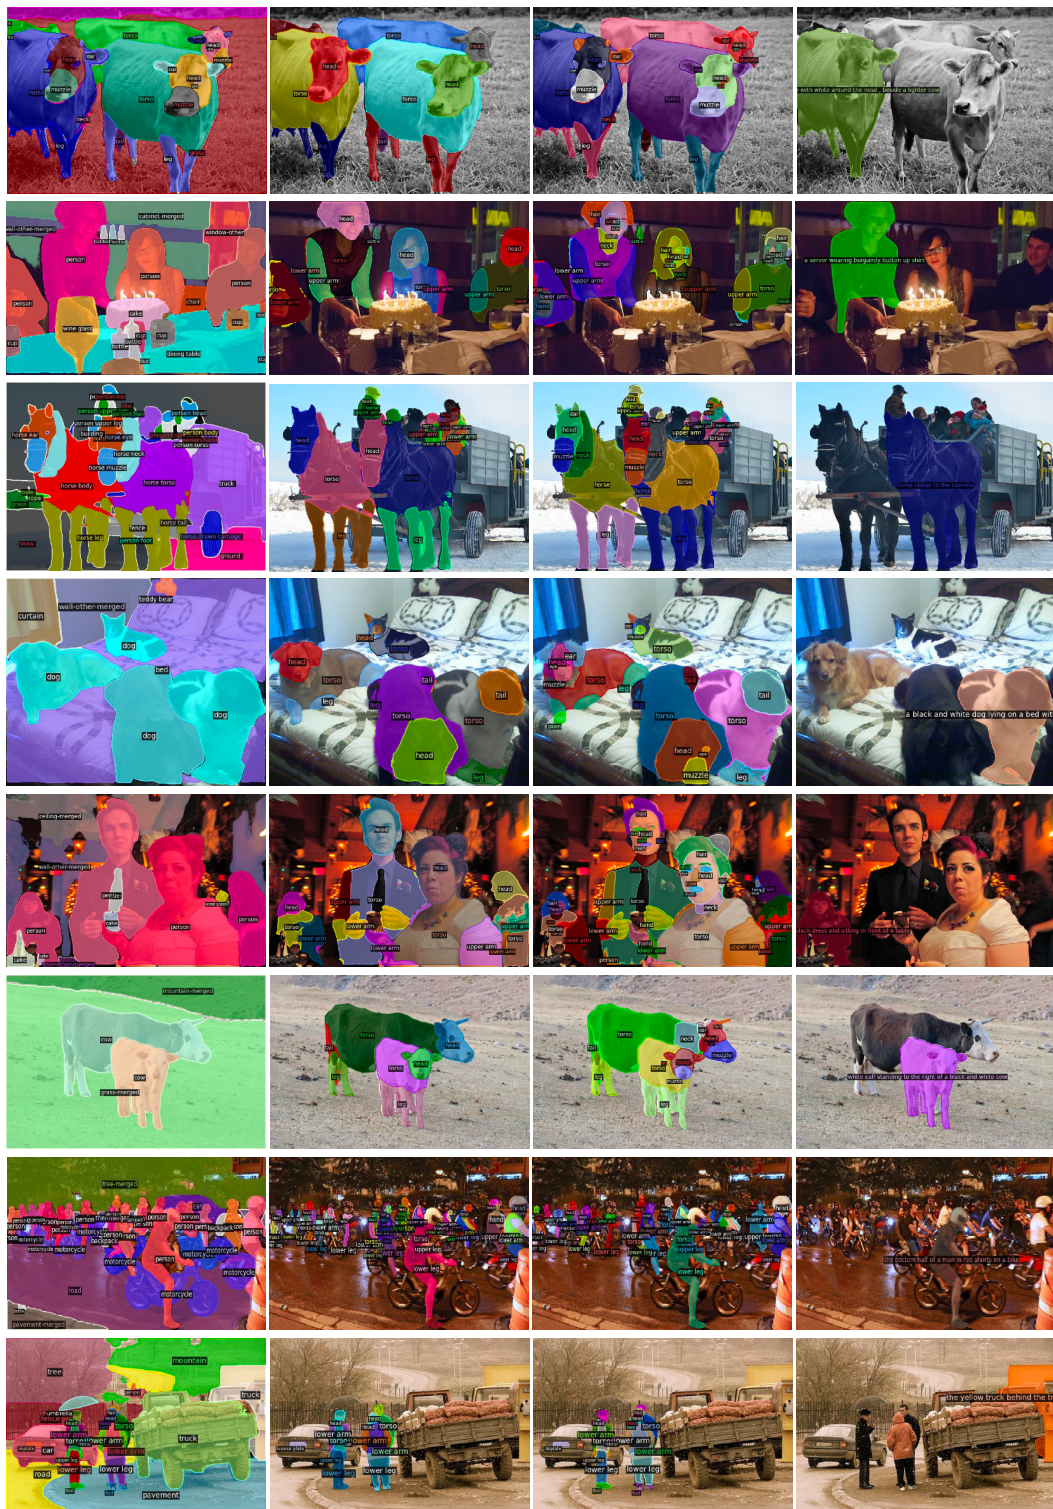

Panoptic Segment

Part Segment

Subpart Segment

Referring Segment

**Figure A1:** More visualizations showcasing panoptic segmentation, part segmentation, subpart segmentation, and referring segmentation results on RefCOCO. It is recommended to view the results in color and zoom in for better detail.



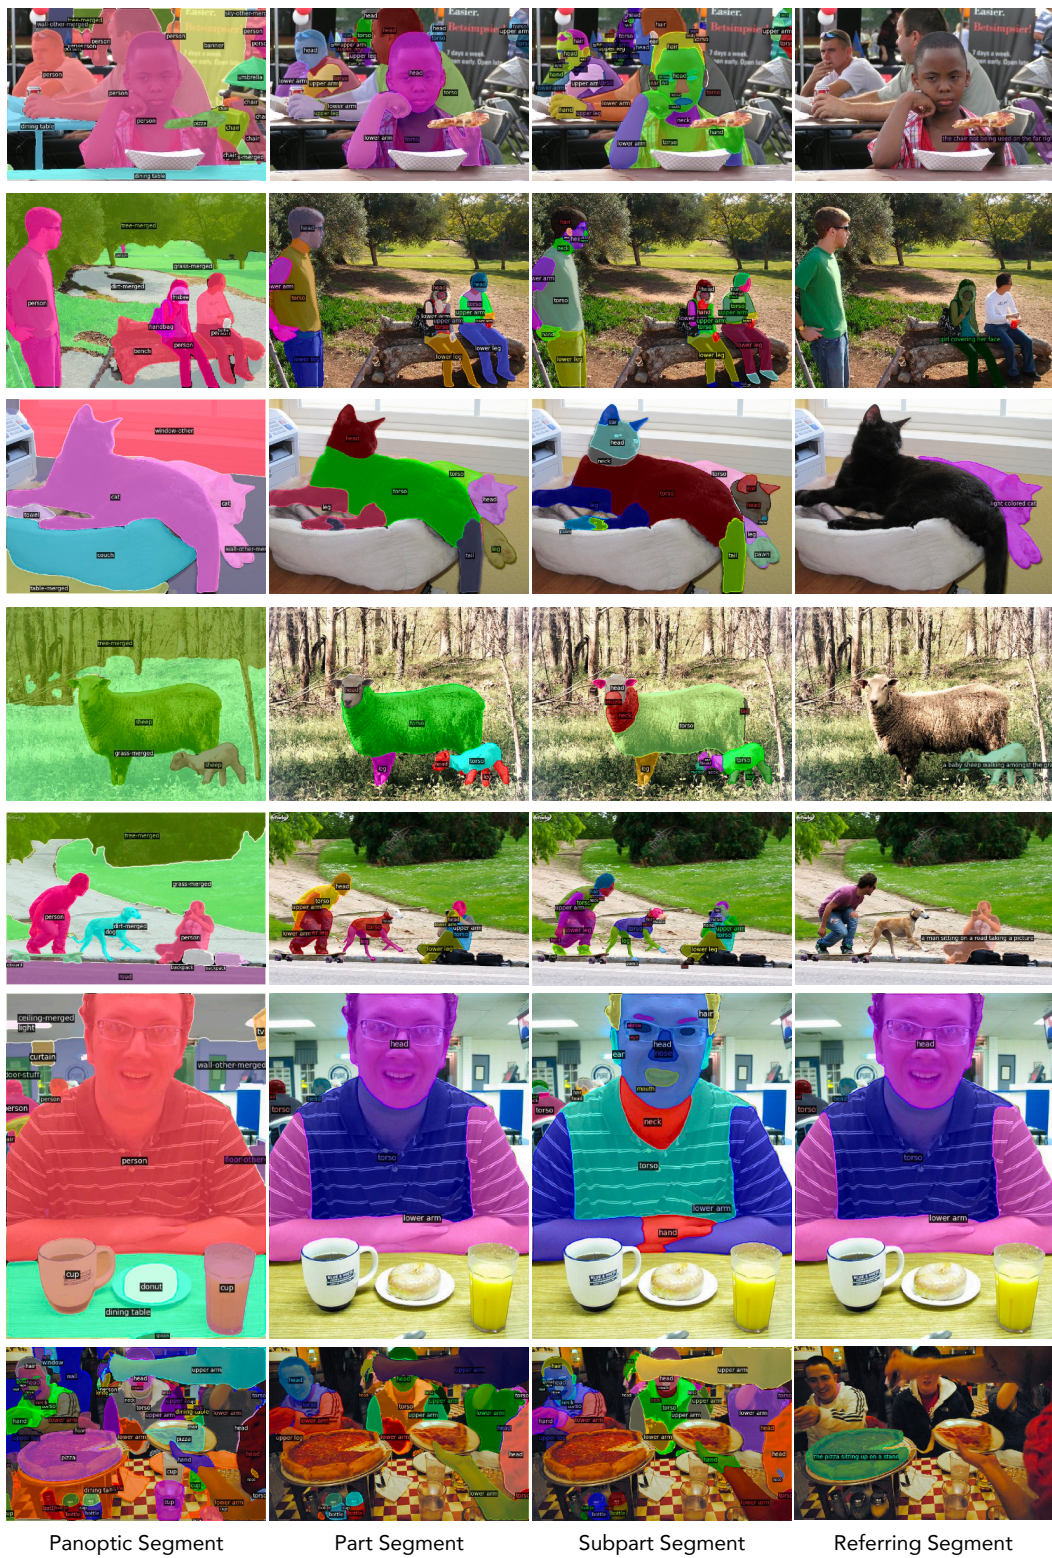

**Figure A2:** More visualizations showcasing panoptic segmentation, part segmentation, subpart segmentation, and referring segmentation results on RefCOCO. It is recommended to view the results in color and zoom in for better detail.



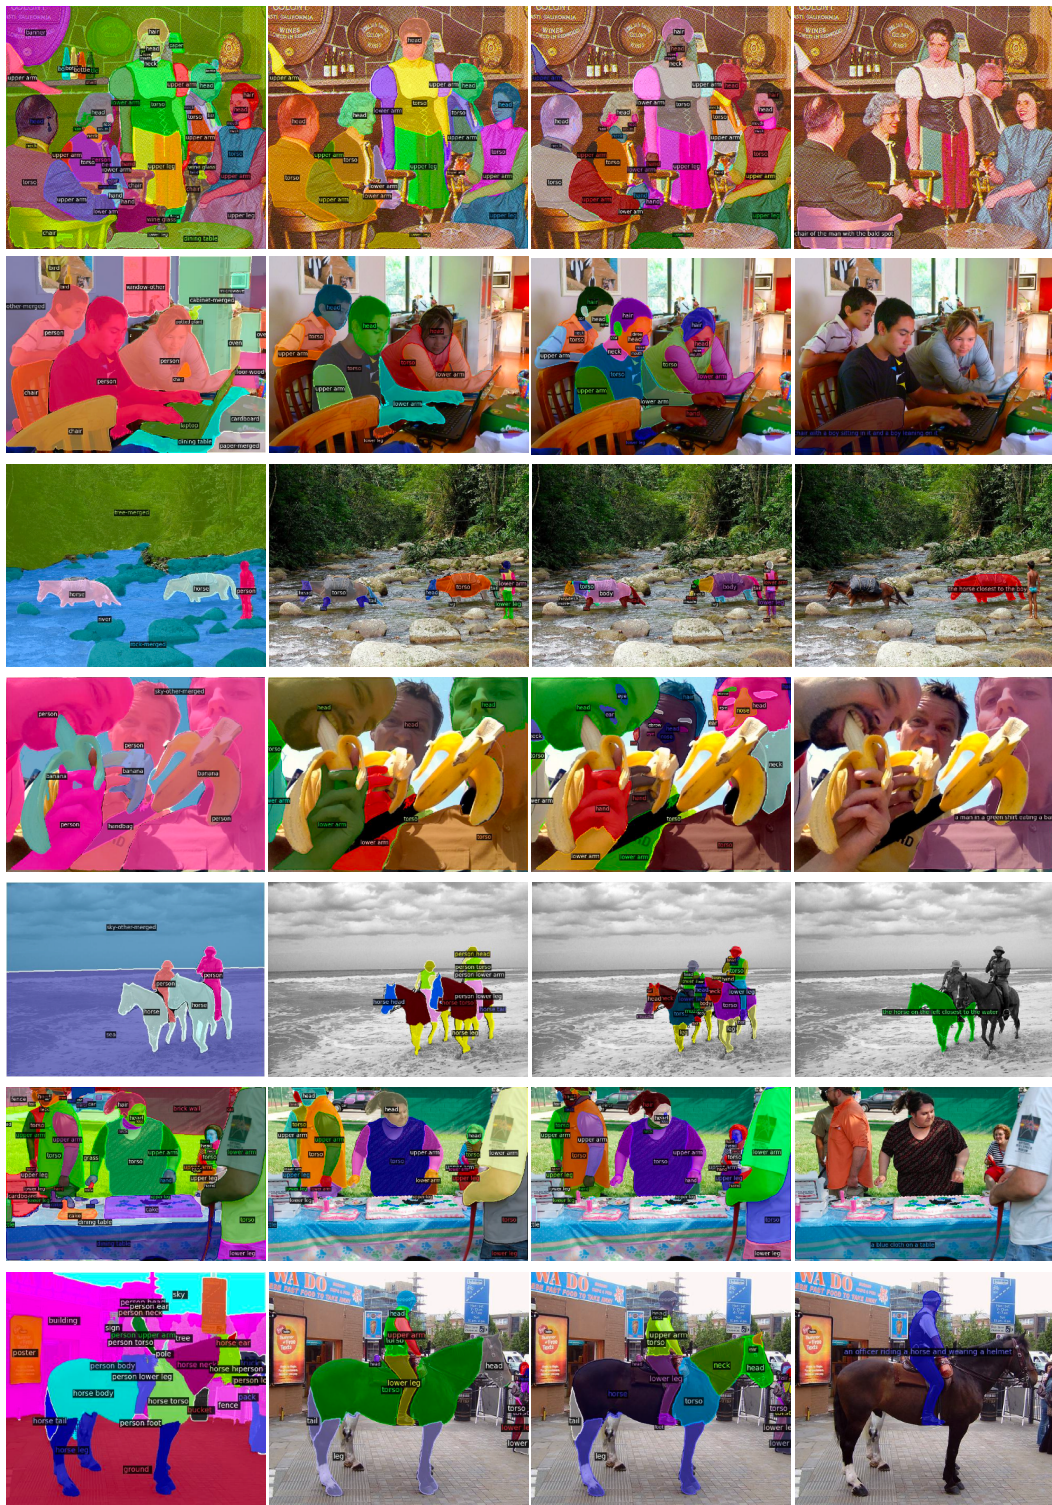

Panoptic Segment

Part Segment

Subpart Segment

Referring Segment

**Figure A3:** More visualizations showcasing panoptic segmentation, part segmentation, subpart segmentation, and referring segmentation results on RefCOCO. It is recommended to view the results in color and zoom in for better detail.



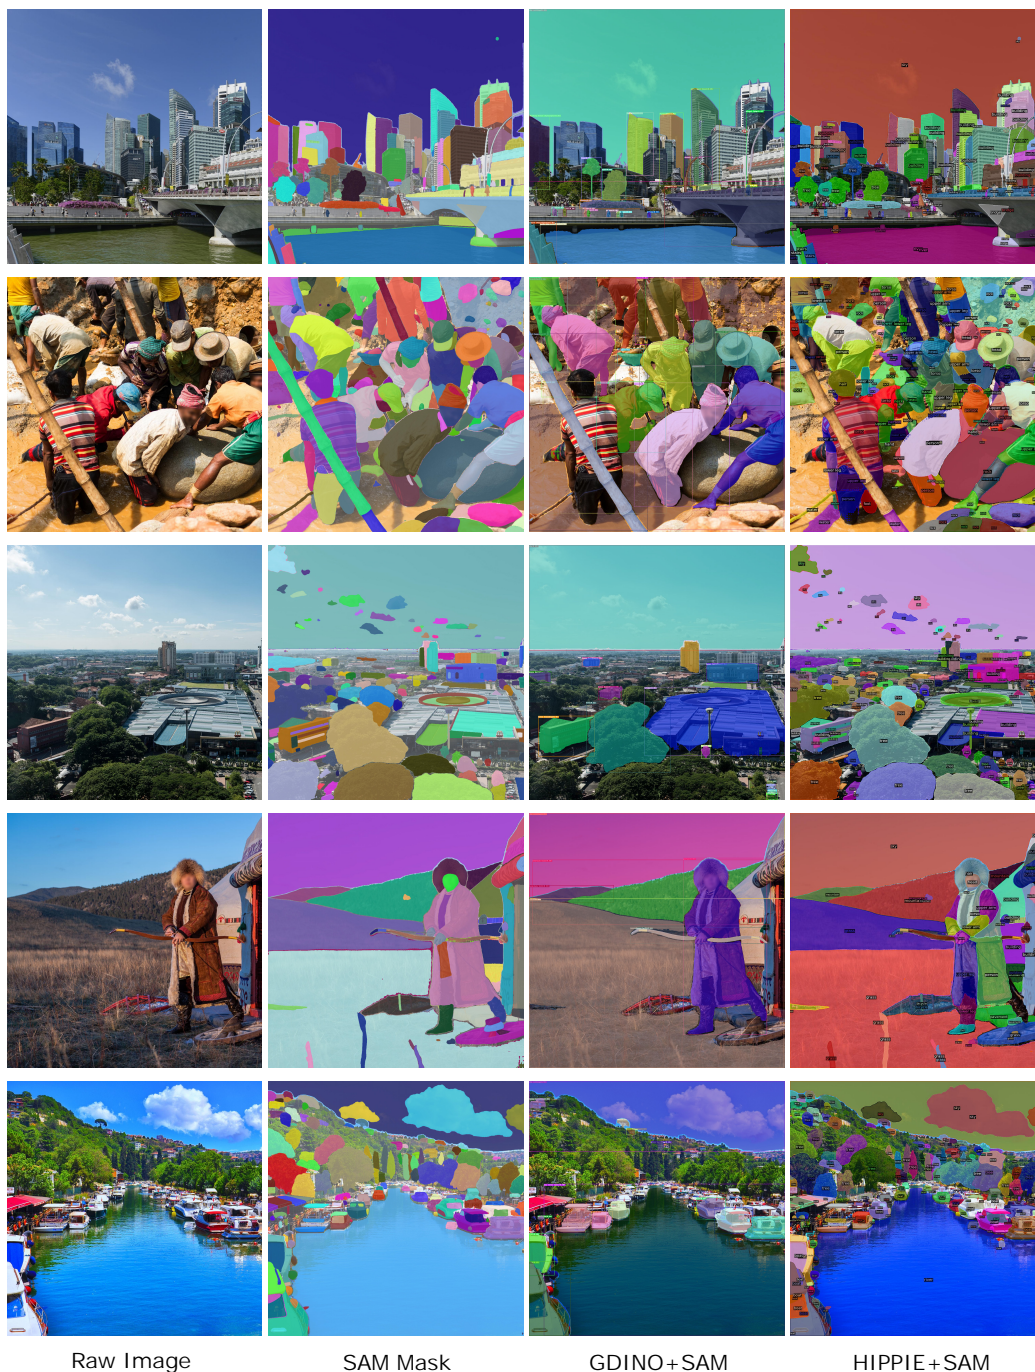

**Figure A4:** Results of merging HIPIE with SAM for hierarchical segmentation. By integrating the part masks from our model and conducting a vote among SAM’s panoptic masks, we generate finely detailed mask outputs. Our method demonstrates fewer misclassifications and overlooked masks across the SA-1B dataset compared to the Grounding DINO + SAM approach. Furthermore, our technique excels in differentiating between intra-class objects and identifying distinct object parts.



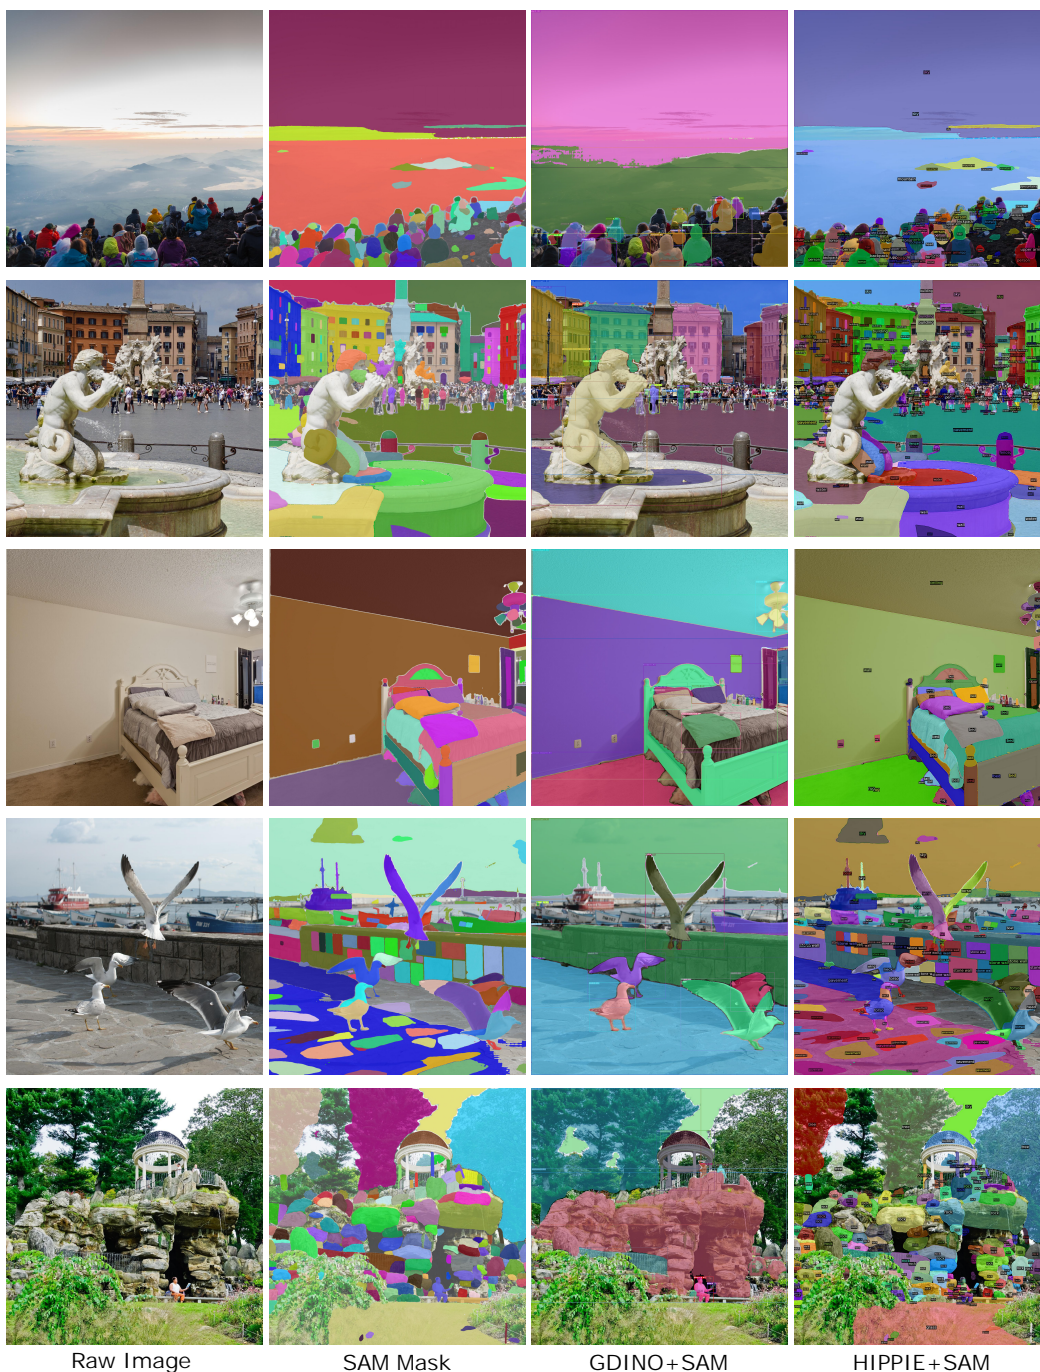

Raw Image

SAM Mask

GDINO+SAM

HIPPIE+SAM

**Figure A5:** Additional results of merging HIPPIE with SAM for hierarchical segmentation. By integrating the part masks from our model and conducting a vote among SAM’s panoptic masks, we generate finely detailed mask outputs. Our method demonstrates fewer misclassifications and overlooked masks across the SA-1B dataset compared to the Grounding DINO + SAM approach. Furthermore, our technique excels in differentiating between intra-class objects and identifying distinct object parts.



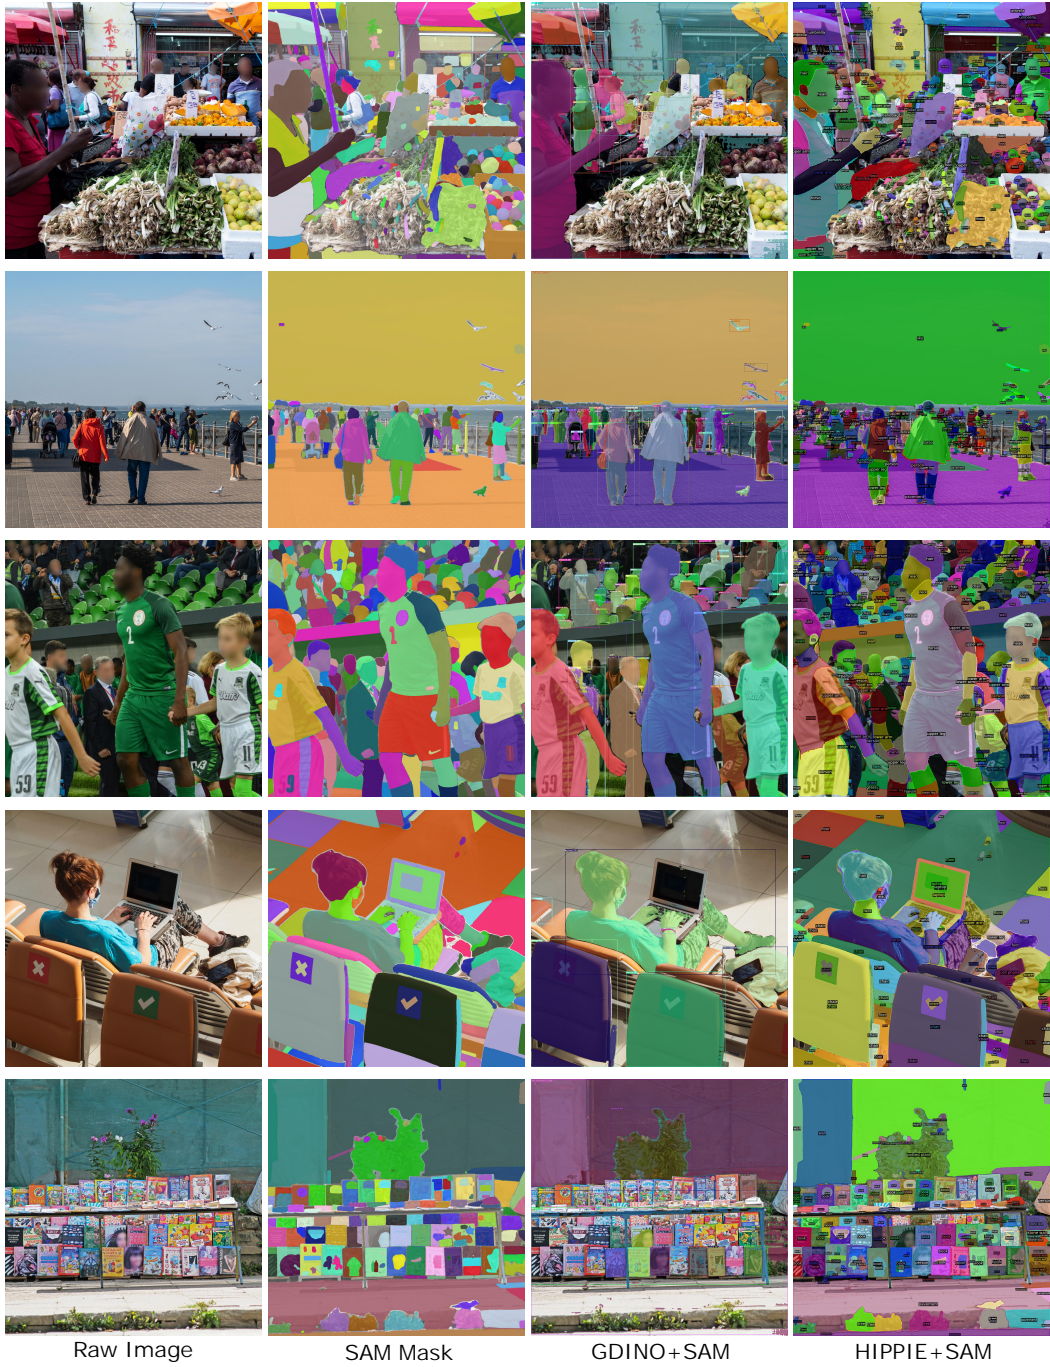

**Figure A6:** Additional results of merging HIPIE with SAM for hierarchical segmentation. By integrating the part masks from our model and conducting a vote among SAM’s panoptic masks, we generate finely detailed mask outputs. Our method demonstrates fewer misclassifications and overlooked masks across the SA-1B dataset compared to the Grounding DINO + SAM approach. Furthermore, our technique excels in differentiating between intra-class objects and identifying distinct object parts.

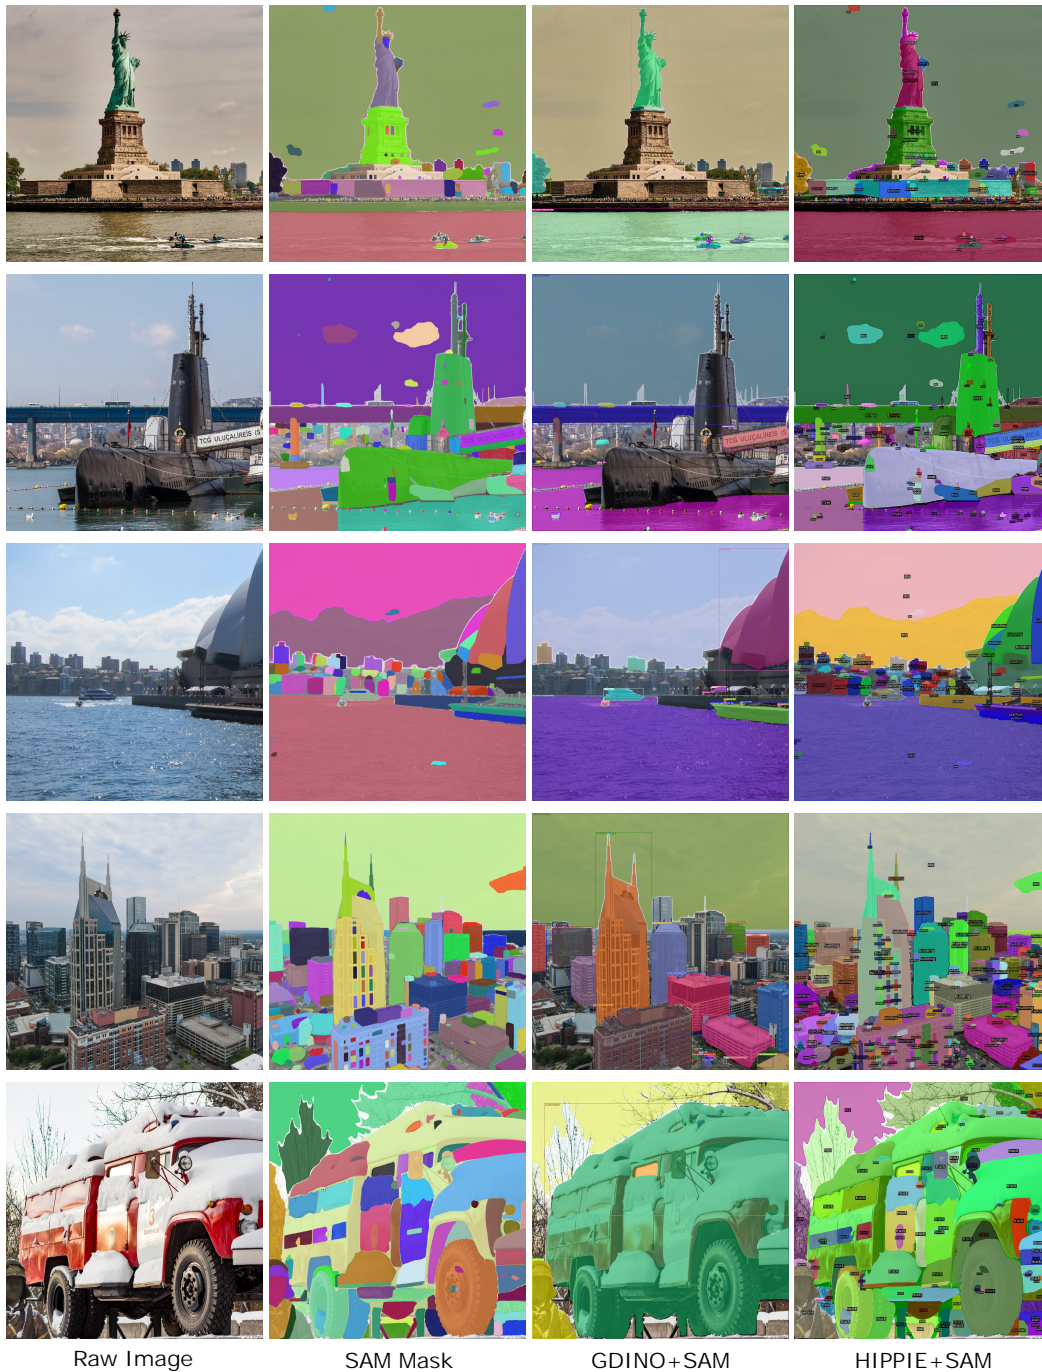

**Figure A7:** Additional results of merging HIPIE with SAM for hierarchical segmentation. By integrating the part masks from our model and conducting a vote among SAM’s panoptic masks, we generate finely detailed mask outputs. Our method demonstrates fewer misclassifications and overlooked masks across the SA-1B dataset compared to the Grounding DINO + SAM approach. Furthermore, our technique excels in differentiating between intra-class objects and identifying distinct object parts.



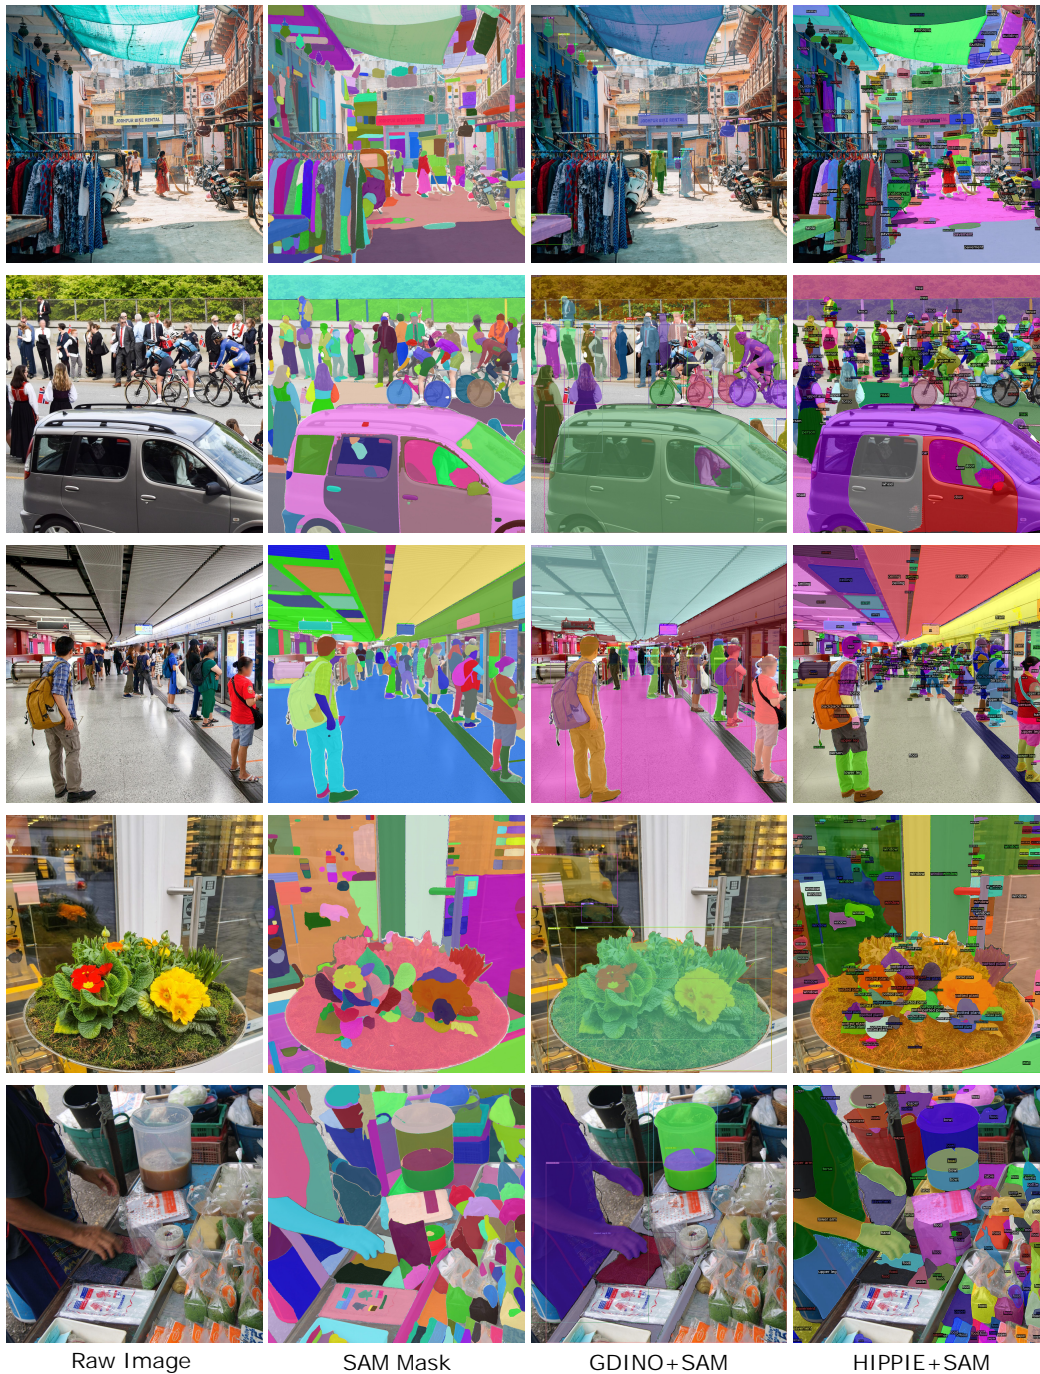

**Figure A8:** Additional results of merging HIPIE with SAM for hierarchical segmentation. By integrating the part masks from our model and conducting a vote among SAM’s panoptic masks, we generate finely detailed mask outputs. Our method demonstrates fewer misclassifications and overlooked masks across the SA-1B dataset compared to the Grounding DINO + SAM approach. Furthermore, our technique excels in differentiating between intra-class objects and identifying distinct object parts.

### Segmentation

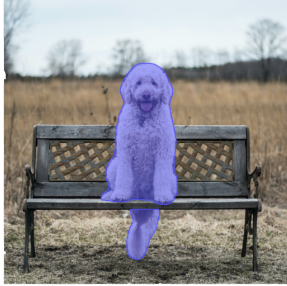

### Generation

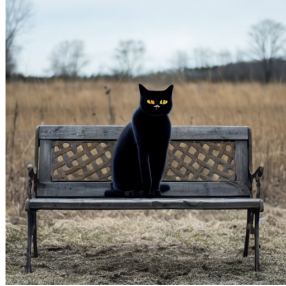

### Prompt

Change **the dog** to  
**a black cat, high resolution,**  
**sitting on a park bench**

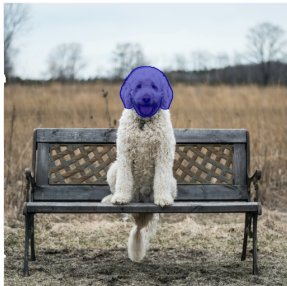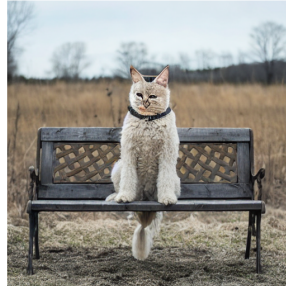

Change **the dog's head** to  
**the head of a cat**

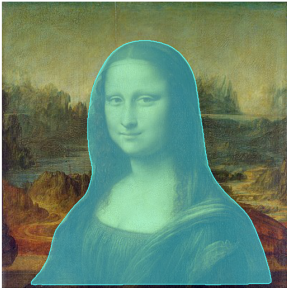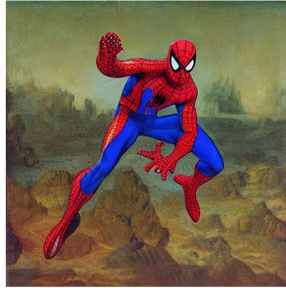

Change **the woman** to  
**Spiderman wearing his suit**

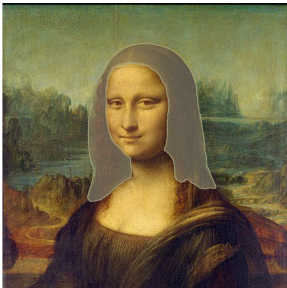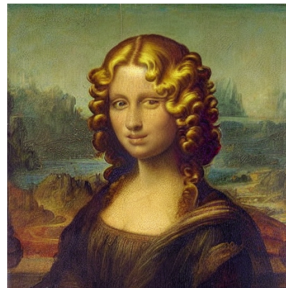

Change **the woman's hair** to  
**Blonde Curly Hair**

**Figure A9:** Results of combining HIPIE with Stable Diffusion for Image inpainting. We leverage our segmentation model to generate masks for the redrawing process. Our model can uniquely achieve fine-grained control by providing part segmentation masks.

## References

- [1] E. H. Adelson. On seeing stuff: the perception of materials by humans and machines. In *Human vision and electronic imaging VI*, volume 4299, pages 1–12. SPIE, 2001.
- [2] M. Bucher, T.-H. Vu, M. Cord, and P. Pérez. Zero-shot semantic segmentation. In *NeurIPS*, 2019.
- [3] Z. Cai and N. Vasconcelos. Cascade r-cnn: high quality object detection and instance segmentation. *IEEE transactions on pattern analysis and machine intelligence*, 43(5):1483–1498, 2019.
- [4] B. Cheng, I. Misra, A. G. Schwing, A. Kirillov, and R. Girdhar. Masked-attention mask transformer for universal image segmentation. 2022.
- [5] D. de Geus, P. Meletis, C. Lu, X. Wen, and G. Dubbelman. Part-aware panoptic segmentation. In *Proceedings of the IEEE/CVF Conference on Computer Vision and Pattern Recognition*, pages 5485–5494, 2021.
- [6] J. Devlin, M.-W. Chang, K. Lee, and K. Toutanova. Bert: Pre-training of deep bidirectional transformers for language understanding. *arXiv preprint arXiv:1810.04805*, 2018.
- [7] N. Dhanachandra, K. Manglem, and Y. J. Chanu. Image segmentation using k-means clustering algorithm and subtractive clustering algorithm. *Procedia Computer Science*, 54:764–771, 2015.
- [8] H. Ding, C. Liu, S. Wang, and X. Jiang. Vision-language transformer and query generation for referring segmentation. In *Proceedings of the IEEE/CVF International Conference on Computer Vision*, pages 16321–16330, 2021.
- [9] H. Ding, C. Liu, S. Wang, and X. Jiang. Vlt: Vision-language transformer and query generation for referring segmentation. *IEEE Transactions on Pattern Analysis and Machine Intelligence*, 2022.
- [10] Z. Ding, J. Wang, and Z. Tu. Open-vocabulary panoptic segmentation with maskclip. *arXiv preprint arXiv:2208.08984*, 2022.
- [11] A. Dosovitskiy, L. Beyer, A. Kolesnikov, D. Weissenborn, X. Zhai, T. Unterthiner, M. Dehghani, M. Minderer, G. Heigold, S. Gelly, et al. An image is worth 16x16 words: Transformers for image recognition at scale. In *International Conference on Learning Representations*.
- [12] M. Everingham, L. Van Gool, C. K. Williams, J. Winn, and A. Zisserman. The pascal visual object classes (voc) challenge. *International journal of computer vision*, 88:303–338, 2010.
- [13] G. Feng, Z. Hu, L. Zhang, and H. Lu. Encoder fusion network with co-attention embedding for referring image segmentation. In *Proceedings of the IEEE/CVF Conference on Computer Vision and Pattern Recognition*, pages 15506–15515, 2021.
- [14] D. A. Forsyth and J. Ponce. *Computer vision: a modern approach*. prentice hall professional technical reference, 2002.
- [15] Z. Ge, S. Liu, F. Wang, Z. Li, and J. Sun. Yolox: Exceeding yolo series in 2021. *arXiv preprint arXiv:2107.08430*, 2021.
- [16] G. Ghiasi, X. Gu, Y. Cui, and T.-Y. Lin. Scaling open-vocabulary image segmentation with image-level labels. In *Computer Vision–ECCV 2022: 17th European Conference, Tel Aviv, Israel, October 23–27, 2022, Proceedings, Part XXXVI*, pages 540–557. Springer, 2022.
- [17] R. Girshick. Fast r-cnn. In *Proceedings of the IEEE international conference on computer vision*, pages 1440–1448, 2015.
- [18] K. He, X. Chen, S. Xie, Y. Li, P. Dollár, and R. Girshick. Masked autoencoders are scalable vision learners. In *Proceedings of the IEEE/CVF Conference on Computer Vision and Pattern Recognition*, pages 16000–16009, 2022.
- [19] K. He, X. Zhang, S. Ren, and J. Sun. Deep residual learning for image recognition. In *Proceedings of the IEEE conference on computer vision and pattern recognition*, pages 770–778, 2016.
- [20] R. Hu, M. Rohrbach, and T. Darrell. Segmentation from natural language expressions. In *Proceedings of the European Conference on Computer Vision (ECCV)*, 2016.
- [21] T. Hui, S. Liu, S. Huang, G. Li, S. Yu, F. Zhang, and J. Han. Linguistic structure guided context modeling for referring image segmentation. In *Computer Vision–ECCV 2020: 16th European Conference, Glasgow, UK, August 23–28, 2020, Proceedings, Part X 16*, pages 59–75. Springer, 2020.
- [22] S. K. Jagadeesh, R. Schuster, and D. Stricker. Multi-task fusion for efficient panoptic-part segmentation. *arXiv preprint arXiv:2212.07671*, 2022.
- [23] Y. Jing, T. Kong, W. Wang, L. Wang, L. Li, and T. Tan. Locate then segment: A strong pipeline for referring image segmentation. In *Proceedings of the IEEE/CVF Conference on Computer Vision and Pattern Recognition*, pages 9858–9867, 2021.



- 171 [24] A. Kamath, M. Singh, Y. LeCun, G. Synnaeve, I. Misra, and N. Carion. Mdetr-modulated detection for  
172 end-to-end multi-modal understanding. In *Proceedings of the IEEE/CVF International Conference on*  
173 *Computer Vision*, pages 1780–1790, 2021.
- 174 [25] A. Kirillov, K. He, R. Girshick, C. Rother, and P. Dollár. Panoptic segmentation. In *Proceedings of the*  
175 *IEEE/CVF Conference on Computer Vision and Pattern Recognition*, pages 9404–9413, 2019.
- 176 [26] A. Kirillov, E. Mintun, N. Ravi, H. Mao, C. Rolland, L. Gustafson, T. Xiao, S. Whitehead, A. C. Berg,  
177 W.-Y. Lo, P. Dollár, and R. Girshick. Segment anything. *arXiv:2304.02643*, 2023.
- 178 [27] A. Kirillov, E. Mintun, N. Ravi, H. Mao, C. Rolland, L. Gustafson, T. Xiao, S. Whitehead, A. C. Berg,  
179 W.-Y. Lo, et al. Segment anything. *arXiv preprint arXiv:2304.02643*, 2023.
- 180 [28] H. W. Kuhn. The hungarian method for the assignment problem. *Naval research logistics quarterly*,  
181 2(1-2):83–97, 1955.
- 182 [29] B. Li, K. Q. Weinberger, S. Belongie, V. Koltun, and R. Ranftl. Language-driven semantic segmentation.  
183 In *International Conference on Learning Representations*, 2022.
- 184 [30] F. Li, H. Zhang, S. Liu, J. Guo, L. M. Ni, and L. Zhang. Dn-detr: Accelerate detr training by introducing  
185 query denoising. In *Proceedings of the IEEE/CVF Conference on Computer Vision and Pattern Recognition*,  
186 pages 13619–13627, 2022.
- 187 [31] F. Li, H. Zhang, H. xu, S. Liu, L. Zhang, L. M. Ni, and H.-Y. Shum. Mask dino: Towards a unified  
188 transformer-based framework for object detection and segmentation, 2022.
- 189 [32] L. H. Li\*, P. Zhang\*, H. Zhang\*, J. Yang, C. Li, Y. Zhong, L. Wang, L. Yuan, L. Zhang, J.-N. Hwang,  
190 K.-W. Chang, and J. Gao. Grounded language-image pre-training. In *CVPR*, 2022.
- 191 [33] M. Li and L. Sigal. Referring transformer: A one-step approach to multi-task visual grounding. *Advances*  
192 *in neural information processing systems*, 34:19652–19664, 2021.
- 193 [34] Y. Li, H. Mao, R. Girshick, and K. He. Exploring plain vision transformer backbones for object detection.  
194 In *Computer Vision–ECCV 2022: 17th European Conference, Tel Aviv, Israel, October 23–27, 2022,*  
195 *Proceedings, Part IX*, pages 280–296. Springer, 2022.
- 196 [35] F. Liang, B. Wu, X. Dai, K. Li, Y. Zhao, H. Zhang, P. Zhang, P. Vajda, and D. Marculescu. Open-vocabulary  
197 semantic segmentation with mask-adapted clip. *arXiv preprint arXiv:2210.04150*, 2022.
- 198 [36] T.-Y. Lin, P. Goyal, R. Girshick, K. He, and P. Dollár. Focal loss for dense object detection. In *Proceedings*  
199 *of the IEEE international conference on computer vision*, pages 2980–2988, 2017.
- 200 [37] T.-Y. Lin, M. Maire, S. Belongie, J. Hays, P. Perona, D. Ramanan, P. Dollár, and C. L. Zitnick. Microsoft  
201 coco: Common objects in context. In *Computer Vision–ECCV 2014: 13th European Conference, Zurich,*  
202 *Switzerland, September 6–12, 2014, Proceedings, Part V 13*, pages 740–755. Springer, 2014.
- 203 [38] J. Liu, H. Ding, Z. Cai, Y. Zhang, R. K. Satzoda, V. Mahadevan, and R. Manmatha. Polyformer: Referring  
204 image segmentation as sequential polygon generation. *arXiv preprint arXiv:2302.07387*, 2023.
- 205 [39] S. Liu, Z. Zeng, T. Ren, F. Li, H. Zhang, J. Yang, C. Li, J. Yang, H. Su, J. Zhu, et al. Grounding dino:  
206 Marrying dino with grounded pre-training for open-set object detection. *arXiv preprint arXiv:2303.05499*,  
207 2023.
- 208 [40] J. Long, E. Shelhamer, and T. Darrell. Fully convolutional networks for semantic segmentation. In  
209 *Proceedings of the IEEE conference on computer vision and pattern recognition*, pages 3431–3440, 2015.
- 210 [41] I. Loshchilov and F. Hutter. Decoupled weight decay regularization. In *International Conference on*  
211 *Learning Representations*.
- 212 [42] R. Mottaghi, X. Chen, X. Liu, N.-G. Cho, S.-W. Lee, S. Fidler, R. Urtasun, and A. Yuille. The role of  
213 context for object detection and semantic segmentation in the wild. In *Proceedings of the IEEE conference*  
214 *on computer vision and pattern recognition*, pages 891–898, 2014.
- 215 [43] L. Muchen and S. Leonid. Referring transformer: A one-step approach to multi-task visual grounding. In  
216 *Thirty-Fifth Conference on Neural Information Processing Systems*, 2021.
- 217 [44] V. K. Nagaraja, V. I. Morariu, and L. S. Davis. Modeling context between objects for referring expression  
218 understanding. In *Computer Vision–ECCV 2016: 14th European Conference, Amsterdam, The Netherlands,*  
219 *October 11–14, 2016, Proceedings, Part IV 14*, pages 792–807. Springer, 2016.
- 220 [45] R. Nock and F. Nielsen. Statistical region merging. *IEEE Transactions on pattern analysis and machine*  
221 *intelligence*, 26(11):1452–1458, 2004.
- 222 [46] A. Radford, J. W. Kim, C. Hallacy, A. Ramesh, G. Goh, S. Agarwal, G. Sastry, A. Askell, P. Mishkin,  
223 J. Clark, et al. Learning transferable visual models from natural language supervision. In *International*  
224 *conference on machine learning*, pages 8748–8763. PMLR, 2021.
- 225 [47] Y. Rao, W. Zhao, G. Chen, Y. Tang, Z. Zhu, G. Huang, J. Zhou, and J. Lu. Denseclip: Language-guided  
226 dense prediction with context-aware prompting. In *Proceedings of the IEEE/CVF Conference on Computer*  
227 *Vision and Pattern Recognition*, pages 18082–18091, 2022.

- 228 [48] H. Rezatofighi, N. Tsoi, J. Gwak, A. Sadeghian, I. Reid, and S. Savarese. Generalized intersection over  
229 union: A metric and a loss for bounding box regression. In *Proceedings of the IEEE/CVF conference on*  
230 *computer vision and pattern recognition*, pages 658–666, 2019.
- 231 [49] R. Rombach, A. Blattmann, D. Lorenz, P. Esser, and B. Ommer. High-resolution image synthesis with  
232 latent diffusion models, 2021.
- 233 [50] R. Rombach, A. Blattmann, D. Lorenz, P. Esser, and B. Ommer. High-resolution image synthesis with  
234 latent diffusion models. In *Proceedings of the IEEE/CVF Conference on Computer Vision and Pattern*  
235 *Recognition*, pages 10684–10695, 2022.
- 236 [51] S. Shao, Z. Li, T. Zhang, C. Peng, G. Yu, X. Zhang, J. Li, and J. Sun. Objects365: A large-scale, high-  
237 quality dataset for object detection. In *Proceedings of the IEEE/CVF international conference on computer*  
238 *vision*, pages 8430–8439, 2019.
- 239 [52] C. H. Sudre, W. Li, T. Vercauteren, S. Ourselin, and M. Jorge Cardoso. Generalised dice overlap as a deep  
240 learning loss function for highly unbalanced segmentations. In *Deep Learning in Medical Image Analysis*  
241 *and Multimodal Learning for Clinical Decision Support: Third International Workshop, DLMIA 2017, and*  
242 *7th International Workshop, ML-CDS 2017, Held in Conjunction with MICCAI 2017, Québec City, QC,*  
243 *Canada, September 14, Proceedings 3*, pages 240–248. Springer, 2017.
- 244 [53] R. Szeliski. *Computer vision: algorithms and applications*. Springer Nature, 2022.
- 245 [54] Z. Wang, Y. Lu, Q. Li, X. Tao, Y. Guo, M. Gong, and T. Liu. Cris: Clip-driven referring image segmentation.  
246 In *Proceedings of the IEEE/CVF conference on computer vision and pattern recognition*, pages 11686–  
247 11695, 2022.
- 248 [55] J. Wu, X. Li, X. Li, H. Ding, Y. Tong, and D. Tao. Towards robust referring image segmentation. *arXiv*  
249 *preprint arXiv:2209.09554*, 2022.
- 250 [56] Y. Xian, S. Choudhury, Y. He, B. Schiele, and Z. Akata. Semantic projection network for zero-and  
251 few-label semantic segmentation. In *Proceedings of the IEEE/CVF Conference on Computer Vision and*  
252 *Pattern Recognition*, pages 8256–8265, 2019.
- 253 [57] J. Xu, S. De Mello, S. Liu, W. Byeon, T. Breuel, J. Kautz, and X. Wang. Groupvit: Semantic segmentation  
254 emerges from text supervision. In *Proceedings of the IEEE/CVF Conference on Computer Vision and*  
255 *Pattern Recognition*, pages 18134–18144, 2022.
- 256 [58] J. Xu, J. Hou, Y. Zhang, R. Feng, Y. Wang, Y. Qiao, and W. Xie. Learning open-vocabulary semantic  
257 segmentation models from natural language supervision. *arXiv preprint arXiv:2301.09121*, 2023.
- 258 [59] J. Xu, S. Liu, A. Vahdat, W. Byeon, X. Wang, and S. De Mello. Open-vocabulary panoptic segmentation  
259 with text-to-image diffusion models. *arXiv preprint arXiv:2303.04803*, 2023.
- 260 [60] M. Xu, Z. Zhang, F. Wei, Y. Lin, Y. Cao, H. Hu, and X. Bai. A simple baseline for open-vocabulary  
261 semantic segmentation with pre-trained vision-language model. In *Computer Vision–ECCV 2022: 17th*  
262 *European Conference, Tel Aviv, Israel, October 23–27, 2022, Proceedings, Part XXIX*, pages 736–753.  
263 Springer, 2022.
- 264 [61] B. Yan, Y. Jiang, J. Wu, D. Wang, P. Luo, Z. Yuan, and H. Lu. Universal instance perception as object  
265 discovery and retrieval. *arXiv preprint arXiv:2303.06674*, 2023.
- 266 [62] Z. Yang, J. Wang, Y. Tang, K. Chen, H. Zhao, and P. H. Torr. Lavt: Language-aware vision transformer  
267 for referring image segmentation. In *Proceedings of the IEEE/CVF Conference on Computer Vision and*  
268 *Pattern Recognition*, pages 18155–18165, 2022.
- 269 [63] L. Yu, Z. Lin, X. Shen, J. Yang, X. Lu, M. Bansal, and T. L. Berg. Mattnet: Modular attention network for  
270 referring expression comprehension. In *CVPR*, 2018.
- 271 [64] L. Yu, P. Poirson, S. Yang, A. C. Berg, and T. L. Berg. Modeling context in referring expressions. In  
272 *Computer Vision–ECCV 2016: 14th European Conference, Amsterdam, The Netherlands, October 11–14,*  
273 *2016, Proceedings, Part II 14*, pages 69–85. Springer, 2016.
- 274 [65] H. Zhang, F. Li, S. Liu, L. Zhang, H. Su, J. Zhu, L. M. Ni, and H.-Y. Shum. Dino: Detr with improved  
275 denoising anchor boxes for end-to-end object detection. *arXiv preprint arXiv:2203.03605*, 2022.
- 276 [66] W. Zhao, Y. Rao, Z. Liu, B. Liu, J. Zhou, and J. Lu. Unleashing text-to-image diffusion models for visual  
277 perception. *arXiv preprint arXiv:2303.02153*, 2023.
- 278 [67] B. Zhou, H. Zhao, X. Puig, T. Xiao, S. Fidler, A. Barriuso, and A. Torralba. Semantic understanding of  
279 scenes through the ade20k dataset. *International Journal of Computer Vision*, 127:302–321, 2019.
- 280 [68] X. Zhu, W. Su, L. Lu, B. Li, X. Wang, and J. Dai. Deformable detr: Deformable transformers for end-to-end  
281 object detection. *arXiv preprint arXiv:2010.04159*, 2020.
- 282 [69] X. Zou, Z.-Y. Dou, J. Yang, Z. Gan, L. Li, C. Li, X. Dai, H. Behl, J. Wang, L. Yuan, et al. Generalized  
283 decoding for pixel, image, and language. *arXiv preprint arXiv:2212.11270*, 2022.
- 284 [70] X. Zou, J. Yang, H. Zhang, F. Li, L. Li, J. Gao, and Y. J. Lee. Segment everything everywhere all at once.  
285 *arXiv preprint arXiv:2304.06718*, 2023.
